# Supplementary material for: Intraseasonal modulation of Sea Surface Temperatures in the North Tropical Atlantic by African Easterly Waves
Source: Copernicus journal article supplement (doi:10.5194/egusphere-2025-4429), 2025-09-26
Supplement: Supplementary file [file egusphere-2025-4429-AC1-supplement.pdf]

**Corrected Figure 9.** This is the corrected version of figure 9 from the manuscript, together with its caption.

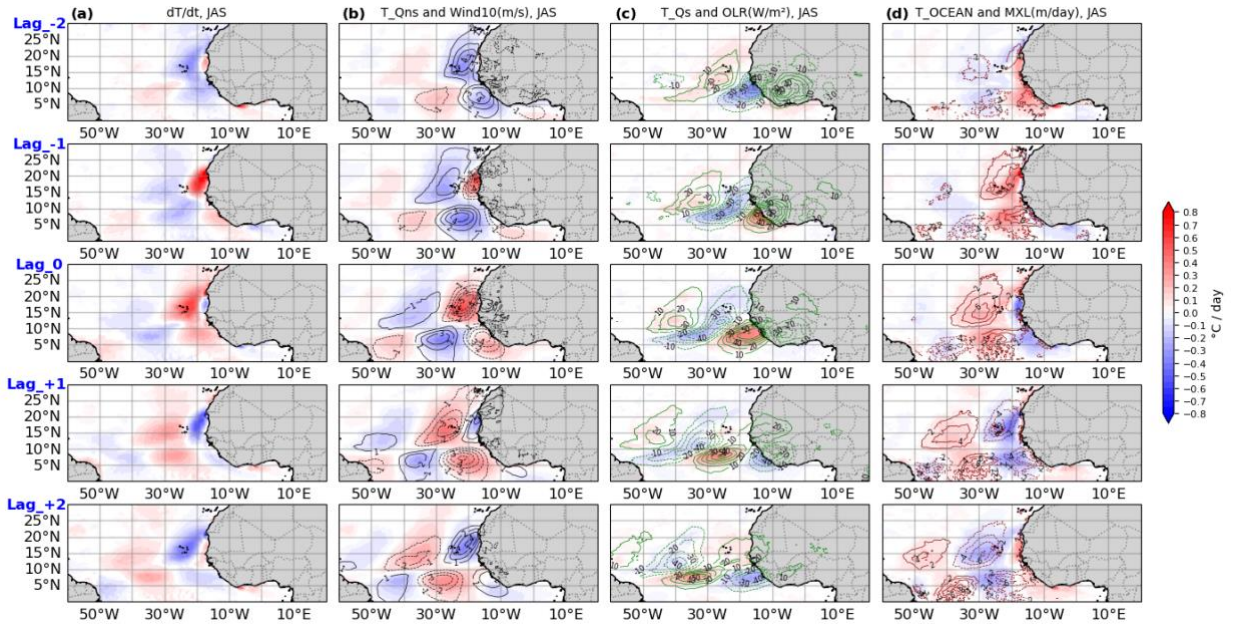

**Figure 9:** Lagged evolution of anomalies in the upper-5-m ocean heat budget terms, regressed onto the 2–10-day AEWs index. Panels show: (column a) mixed-layer temperature tendency ( $dT/dt$ ), (b) contribution from non-solar surface heat fluxes ( $T_{Q_{ns}}$ , shading) with 10-m wind speed anomalies overlaid (contours), (c) contribution from solar radiation ( $T_{Q_s}$ , shading) with OLR anomalies (contours), and (d) oceanic processes ( $T_{OCEAN}$ , shading) with mixed-layer depth (MXL) anomalies (contours). Regressions are presented at different time lags (in days) to capture the temporal evolution associated with AEWs passage.
